# Supplementary material
Source: publisher figshare collection journal article supplement (https://sage.figshare.com/ndownloader/files/21240006)
Supplement: Supplementary file 1 [file 21240006]

## Dynamic studies GRADE explanations

### 1) Fluid balance:

Risk of bias: Serious-EdvHg#Frkudqh#Jlbn#r#Eldlv#wrrq#ldw#wxg#lv#z#huh#r#xqg#wr#eh#dw#dk#lk#  
ulvn#r#i#eldv#p#rvw#r#ihq#g#xh#wr#k#fn#r#i#e#qg#lj#qg#k#fn#r#i#d#r#fdwlrq#lvvhvvp#hqwl

Iqfrqvlwhqf|=#Q#rw#vhulrxv0#Frqvlwhq#w#hvxow#lp#rqj#k#h#wxg#lv#dqg#r#z#h#yh#r#i#  
khwhurjhghlw|#

Iqglhfwghvv=#Q#rw#vhulrxv0#6#rxw#r#i#k#h#7#wxg#lv#z#huh#s#ulp#dub|#r#fxvhg#r#q#i#o#lg#e#dvHg#  
rxwfrp#hv1#

Ip#suhflv#lrq#=#V#hulrxv0#Z#lg#h#Frqilghqfh#lqwhuydov#dqg#f#kdqjh#k#h#uxh#h#i#hfw#r#wfrp#h1

Sxedfdwlrq#e#ldv=#Q#rw#vhulrxv0#Wk#h#dxwkruv#g#hwhfwng#qr#h#y#ghqfh#r#i#s#xedfdwlrq#e#ldv#r#u#  
whvh#u#ldov

Odujh#h#i#hfw#=#Q#r#/#xqf#du#h#i#hfw#e#dvHg#r#q#Frqilghqfh#lqwhuydov1#

Frqirxqglj#=#Q#r0#D#UFW#/#qr#h#y#ghqfh#r#i#Frqirxqglj1#

Grvh#h#v#srqvh#j#udg#lhq#=#Q#r1#

### 2) Fluid infusion:

Risk of bias: Serious-EdvHg#Frkudqh#Jlbn#r#Eldlv#wrrq#ldw#wxg#lv#z#huh#r#xqg#wr#eh#dw#dk#lk#  
ulvn#r#i#eldv#p#rvw#r#ihq#g#xh#wr#k#fn#r#i#e#qg#lj#qg#k#fn#r#i#d#r#fdwlrq#lvvhvvp#hqwl

Iqfrqvlwhqf|=#V#hulrxv0#Iqfrqvlwhq#w#hvxow#lp#rqj#k#h#wxg#lv#dqg#k#lk#h#yh#r#i#  
khwhurjhghlw|#

Iqglhfwghvv=#Q#rw#vhulrxv0#6#rxw#r#i#k#h#7#wxg#lv#z#huh#s#ulp#dub|#r#fxvhg#r#q#i#o#lg#e#dvHg#  
rxwfrp#hv1#

Ip#suhflv#lrq#=#V#hulrxv0#Z#lg#h#Frqilghqfh#lqwhuydov#dqg#f#kdqjh#k#h#uxh#h#i#hfw#r#wfrp#h#urp  
dujh#h#i#hfw#r#p#l#p#d#l

Sxedfdwlrq#e#ldv=#Q#rw#vhulrxv0#Wk#h#dxwkruv#g#hwhfwng#qr#h#y#ghqfh#r#i#s#xedfdwlrq#e#ldv#r#u#  
whvh#u#ldov

Odujh#h#i#hfw#=#D#q#h#i#hfw#r#i#ghj#dwyh#95:p#o#v#d#v#lj#q#l#fdq#h#i#hfw#dqg#E5{#k#h#h#i#hfw#v#l#h#  
xvhg#q#l#h#h#fhq#w#u#ldov#lvvhvvlqj#g#l#h#h#q#f#h#q#i#o#lg#e#d#l#q#f#h#q#v#h#w#f#w#k#r#f#n#l

Frqirxqglj#=#Q#r0#D#UFW#/#qr#h#y#ghqfh#r#i#Frqirxqglj1#

Grvh#h#v#srqvh#j#udg#lhq#=#Q#r1#

## Static studies GRADE explanations

### 1) Ixlg#edolqfh

Risk of bias: Serious-EdvHg#Frkudqh#Jlbn#r#Eldlv#wrrq#ldw#wxg#lv#z#huh#r#xqg#wr#eh#dw#dk#lk#  
ulvn#r#i#eldv#p#rvw#r#ihq#g#xh#wr#k#fn#r#i#e#qg#lj#qg#k#fn#r#i#d#r#fdwlrq#lvvhvvp#hqwl#D#or#/#  
rqh#s#urvshfwlyh#Frkruw#wxg|#q#f#o#ghg1

Iqfrqvlwhqf|=#V#hulrxv0#Iqfrqvlwhq#w#hvxow#lp#rqj#k#h#wxg#lv#dqg#k#lk#h#yh#r#i#  
khwhurjhghlw|#433(, #

Iqg lhf qhv = Q rw # h u l r x v 0 # 5 # x w # r i # k h # 6 # w x g l h v # z h u h # s u l p d u b | # r f x v h g # r q # i o x l g o e d v h g # r x w f r p h v l #

I p s u h f l v l r q = Q r w # h u l r x v 0 # 2 d u r z # f r q i l g h q f h # l q w h u y d o v # l q g # g r h v # q r w # f k d q j h # k h # u x h # h i i h f w # r x w f r p h l

S x e d f d w l r q # e l d v = Q r w # h u l r x v 0 # W k h # l x w k r u v # g h w h f w h g # q r # h y l g h q f h # r i # s x e d f d w l r q # e l d v # r u # w k h v h # u l d o v

O d u j h # h i i h f w # h v # z l k # 6 3 3 p o v e h l q j # f r q v l g h u h g # v l j q l i l f d q w #

F r q i r x q g l q j # h v # l q w u r g x f w l r q # r i # s u r v s h f w l y h # f r k r u w # p d | # k d y h # h g x f h g # u x h # h i i h f w # h h q l #

G r v h # h v s r q v h # j u d g l h q w # Q r l #

## 2) Fluid infusion:

Risk of bias: Serious- E d v h g # f r f k u d q h # J l n # r i # E l d v # r r q # l o # w x g l h v # z h u h # r x q g # w r # e h # d w # d # k l j k # u l v n # r i # e l d v # p r v w # r i w h q # g x h # w r # o l f n # r i # e d q g l q j # l q g # o l f n # r i # d o r f d w l r q # d v v h v p h q w l # D o r r # / r q h # s u r v s h f w l y h # f r k r u w # w x g | # q f o x g h g l #

#

I q f r q v l w h q f | = # # h u l r x v 0 # l q f r q v l w h q w # h v x o w # l p r q j # k h # w x g l h v # l q g # r z # h y h d r i # k h w h u r j h q h l w | #

Iqg lhf qhv = Q rw # h u l r x v 0 # 6 # x w # r i # k h # 7 # w x g l h v # z h u h # s u l p d u b | # r f x v h g # r q # i o x l g o e d v h g # r x w f r p h v l #

I p s u h f l v l r q = # h u l r x v 0 # z l g h # f r q i l g h q f h # l q w h u y d o v # l q g # f k d q j h # k h # u x h # h i i h f w # r x w f r p h # u r p o d u j h # h i i h f w # r # p l q p d d

S x e d f d w l r q # e l d v = Q r w # h u l r x v 0 # W k h # l x w k r u v # g h w h f w h g # q r # h y l g h q f h # r i # s x e d f d w l r q # e l d v # r u # w k h v h # u l d o v

O d u j h # h i i h f w # D q # h i i h f w # r i # q h j d w l y h # 5 : p o v # l v # l j q l i l f d q w # h i i h f w # l q g # E 5 { # k h # h i i h f w # v l } h # x v h g # q # d l # h f h q w # u d d o l v v h v l j j # g l i i h u h q f h # q # i o x l g # e d o l q f h # q # h s w l f # k r f n l

F r q i r x q g l q j = Q r o # D o # U F W w # q r # h y l g h q f h # r i # f r q i r x q g l q j l #

G r v h # h v s r q v h # j u d g l h q w # Q r l #

R y h u d o # W S W G # p r u e l g l w | 2 p r u d o w | # J U D G H # h { s o l q d w l r q v

## 1) Mechanical Ventilation:

Risk of bias: Serious- E d v h g # f r f k u d q h # J l n # r i # E l d v # r r q # l o # w x g l h v # z h u h # r x q g # w r # e h # d w # d # k l j k # u l v n # r i # e l d v # p r v w # r i w h q # g x h # w r # o l f n # r i # e d q g l q j # l q g # o l f n # r i # d o r f d w l r q # d v v h v p h q w l

I q f r q v l w h q f | = # # h u l r x v 0 # l q f r q v l w h q w # h v x o w # l p r q j # k h # w x g l h v # l q g # k l j k # h y h d r i # k h w h u r j h q h l w | # : ; ( ,

Iqg lhf qhv = # h u l r x v 0 # R q o | # 5 # w x g l h v # r i # k h # : # z h u h # s u l p d u b | # r f x v h g # r q # p r u e l g l w | # r x w f r p h v # l q f o x g l q j # O R V # r u # g x u d w l r q # r i # p h f k d q l f d o y h q w o d w l r q l

Ip suhflvrlq=#Qrw#vhulrxv0#Orz #lv#frqilghqfh#lqwhuydov#duh#hhdwlyhq #qdurz #lqg#gr#qrw#  
fkdqjh#kxh#uxh#hiihf#xwfrp h1

Sxedfdwlrq#e ldv=#Qrw#vhulrxv0#Wkh#lxwkrw#ghwhfwhg#qr#hylgqhfh#i#sxedfdwlrq#e ldv#iru#  
wkhvh#uldov

Odujh#hiihf#=#Qr0#Wkh#uxh#hiihf#lv#hvv#kdg#rgh#g| #Wur i#hw#ld#hvwlp dwhg#ld#ljqlifdqw#  
hiihf#z rxog#eh#ldw#hdvw#5#g|v#gliihuhqfh#q#p hfkdqldd#yhqwkdwlrq1#

Frqirxqglqj=#Qr0#D#UFW/#qr#hylgqhfh#i#frqirxqglqj1#

Grvh#uhvsrqvh#j udg lhqw=#Qr1#

5,Ohqjwk#i#wd|=

Risk of bias: Vhulrxv0#Based#frfkudqh#Uln#i#e ldv#rrq#ld#vwxg lrv#z huh#irxqg#wr#eh#ldw#ld#k lj k#  
ulm#i#e ldv#p rvw#iwhq#gjh#wr#kfn#i#e dgg lqj #lqg#kfn#i#ldorfdwlrq#ldvvhvvp hqwl

Iqfrqvlvwhqf|#Vhulrxv0#K lj k#hyhqr i#kwhurjhqh lw|#; 4 ( ,#exw#frqvlvwhqwh#hiihf#ldfurvv#B#i  
wkh# #vwxg lrv#

Iqglhfwghvv=#Vhulrxv0#R qd #5 #vwxg lrv#i#kxh#z huh#sup dub| #irfxvhg#rqp ruelg lw| #  
rxwfrp hv#lqfoxglqj #ORV#ru#gxudwlrq#i#p hfkdqldd#yhqwkdwlrq1

Ip suhflvrlq=#Orz #lv#frqilghqfh#lqwhuydov#duh#hhdwlyhq #qdurz #lqg#gr#qrw#fkdqjh#kxh#uxh  
hiihf#xwfrp h1

Sxedfdwlrq#e ldv=#Wkh#lxwkrw#ghwhfwhg#qr#hylgqhfh#i#sxedfdwlrq#e ldv#iru#wkhvh#uldov

Odujh#hiihf#=#hv/#kxh#uxh#hiihf#lv#ehwz hhq#5 06#g|v#hvv#lq#FX#r#q#WSWG/#kdw#ld#lduj h#  
hiihf#lq#hup v#i#hqjwk#i#wd|1#

Frqirxqglqj=#D#UFW/#qr#hylgqhfh#i#frqirxqglqj1

Grvh#uhvsrqvh#j udg lhqw=#Qr1#

3) Prudaw|#

Risk of bias: Vhulrxv0#Based#frfkudqh#Uln#i#e ldv#rrq#ld#vwxg lrv#z huh#irxqg#wr#eh#ldw#ld#k lj k#  
ulm#i#e ldv#p rvw#iwhq#gjh#wr#kfn#i#e dgg lqj #lqg#kfn#i#ldorfdwlrq#ldvvhvvp hqwl

Iqfrqvlvwhqf|#Vhulrxv0#K lj k#hyhqr i#kwhurjhqh lw|#; 4 ( ,#exw#frqvlvwhqwh#hiihf#ldfurvv#B#i  
wkh#B#vwxg lrv#

Iqglhfwghvv=#Vhulrxv0#R qd #1 #vwxg |#i#kxh#z huh#sup dub| #irfxvhg#rqp rudaw| #ldv#ld#  
sup du|#xwfrp h1#

Ip suhflvrlq=#Vhulrxv#ldv#frqilghqfh#lqwhuydov#duh#fkdqjh#kxh#uxh#hiihf#xwfrp h1

Sxedfdwlrq#e ldv=#Wkh#lxwkrw#ghwhfwhg#qr#hylgqhfh#i#sxedfdwlrq#e ldv#iru#wkhvh#uldov

Odujh#hiihf#=#Qr

Frqirxqglqj=#D#UFW/#qr#hylgqhfh#i#frqirxqglqj1#

Grvh#uhvsrqvh#j udg lhqw=#Qr1#
